## Integrative radiogenomic analysis for multicentric radiophenotype in glioblastoma

Doo-Sik Kong<sup>1,2,3,4</sup>, Jinkuk Kim<sup>2,3,4</sup>, In-Hee Lee<sup>2,3,4</sup>, Sung Tae Kim<sup>5</sup>, Ho Jun Seol<sup>1</sup>, Jung-Il Lee<sup>1</sup>, Woong-Yang Park<sup>6</sup>, Gyuha Ryu<sup>7</sup>, Zichen Wang<sup>7</sup>, Avi Ma'ayan<sup>7</sup>, Do-Hyun Nam<sup>1,2,3,4</sup>

<sup>1</sup>Department of Neurosurgery, Samsung Medical Center, Sungkyunkwan University School of Medicine, Seoul, Korea

<sup>2</sup>Samsung Biomedical Research Institute, Samsung Medical Center, Seoul, Korea

<sup>3</sup>Institute for Refractory Cancer Research, Samsung Medical Center, Seoul, Korea

<sup>4</sup>Samsung Advanced Institute of Technology, Samsung Electronics Co., Ltd., Seoul, Korea

<sup>5</sup>Department of Radiology, Samsung Medical Center, Sungkyunkwan University School of Medicine, Seoul, Korea

<sup>6</sup>Samsung Genome Institute, Samsung Medical Center, Seoul, Korea

<sup>7</sup>Department of Pharmacology and Systems Therapeutics, Icahn School of Medicine at Mount Sinai, New York, NY, USA

**Correspondence to:** Do-Hyun Nam, **e-mail:** nsnam@skku.edu

**Keywords:** glioblastoma, radiogenomic, multicentric

**Received:** September 29, 2015

**Accepted:** January 18, 2016

**Published:** February 01, 2016

### ABSTRACT

We postulated that multicentric glioblastoma (GBM) represents more invasiveness form than solitary GBM and has their own genomic characteristics. From May 2004 to June 2010 we retrospectively identified 51 treatment-naïve GBM patients with available clinical information from the Samsung Medical Center data registry. Multicentricity of the tumor was defined as the presence of multiple foci on the T1 contrast enhancement of MR images or having high signal for multiple lesions without contiguity of each other on the FLAIR image. Kaplan-Meier survival analysis demonstrated that multicentric GBM had worse prognosis than solitary GBM (median, 16.03 vs. 20.57 months,  $p < 0.05$ ). Copy number variation (CNV) analysis revealed there was an increase in 11 regions, and a decrease in 17 regions, in the multicentric GBM. Gene expression profiling identified 738 genes to be increased and 623 genes to be decreased in the multicentric radiophenotype ( $p < 0.001$ ). Integration of the CNV and expression datasets identified twelve representative genes: CPM, LANCL2, LAMP1, GAS6, DCUN1D2, CDK4, AGAP2, TSPAN33, PDLIM1, CLDN12, and GTPBP10 having high correlation across CNV, gene expression and patient outcome. Network and enrichment analyses showed that the multicentric tumor had elevated fibrotic signaling pathways compared with a more proliferative and mitogenic signal in the solitary tumors. Noninvasive radiological imaging together with integrative radiogenomic analysis can provide an important tool in helping to advance personalized therapy for the more clinically aggressive subset of GBM.

### INTRODUCTION

Glioblastoma (GBM) is the most common and lethal brain cancer. Recent advances in the molecular analysis of GBM have led to significant advance in our understanding of the molecular mechanisms of this disease [1]. However, the overall survival remains poor with a median survival of 15 months. GBM often spreads through an established route, such as commissural pathways, CSF channels, or through local extension by

satellite formations. Multicentric GBMs have widely separated lesions that cannot be attributed to one of the aforementioned pathways. Thus, we postulated that multicentricity of the tumors represents a more invasive phenotype and has worse clinical outcome. Since Diehn, et al. first demonstrated the association between imaging features and genomic expression patterns in GBM [2], radiogenomic analysis has been recently introduced to identify imaging traits corresponding to different molecular phenotypes with clinical and biologic

relevance [1–12]. Integrative analysis of multi-level molecular profiles for GBM and these imaging features can potentially provide new insights about the molecular mechanisms underlying the observed radiophenotype.

Thus, we postulated that multicentric GBMs have worse prognosis and have differential molecular signatures compared to other forms of GBM. To examine this hypothesis, we performed integrative analysis using RNA-seq analysis, and copy number variation (CNV) analysis and applied to patients with multicentricity phenotype of GBM.

## RESULTS

### Multicentric phenotype in GBM has worse clinical outcome than solitary GBM

A total of 20 out of the 51 patients with GBM were identified to have the multicentricity phenotype by MR imaging. We binary classified 20 patients as having multicentric GBM, and 31 patients having solitary GBM. Cox proportional hazard model and log-rank test demonstrated that multicentric GBM had worse prognosis than their counterparts (median, 16.03 vs. 20.57 months,  $p = 0.031$ ) (Figure 2A). This assessment was based on the patients' MR contrast-enhancement of T1 weighted images and FLAIR images. We found that multicentric radiophenotype was closely associated with poor clinical outcome in the GBM patients. Other clinical parameters, including age, performance status, and extent of resection, were not significantly different between the groups.

### Identification of differentially expressed genes using RNA-seq

We sequenced 51 tumor tissue samples from GBM tumors, with each sample occupying one lane on an Illumina TrueSeq RNA Sample Prep kit. We applied DEGseq to identify the differentially expressed genes between both groups. We identified a signature of 1361 differentially expressed genes when comparing the multicentric radiophenotype with the solitary radiophenotype samples at an adjusted  $p$ -value (false discovery rate)  $< 0.001$ . Of these, 738 genes were increased and 623 genes were decreased in the multicentric radiophenotype compared to the solitary radiophenotype (Figure 3). Enrichment analysis of the decreased genes, comparing the multicentric GBM to the solitary GBM show lower expression of cell cycle genes and genes involved in glycolysis. Interesting enriched terms, for example, are genes involved in abnormal glia cells when knocked out in mice (MP0003436,  $p$ -value  $< 0.000005$ , Fisher Exact test), or direct interactors of the glucose transporter SLC2A4,  $p$ -value  $< 7.414e-23$ , Fisher Exact test. Full results can be accessed at:

<http://amp.pharm.mssm.edu/Enrichr/enrich?dataset=1ah9>

On the other hand, genes that were decreased in the multicentric GBM compared to the solitary GBM were enriched in extracellular matrix and cell adhesion components as well as immune response genes. Interesting

enriched terms included high overlap with genes that cause abnormal nervous system (MP0003633,  $p$ -value  $< 4.1e-14$ , Fisher test) and the Lingula brain region from the Allen brain atlas ( $p$ -value  $< 2.365e-8$ , Fisher test). The Lingula wrinkle shape might use similar gene regulatory programs observed in multicentric GBM. Interestingly, the glucose transporter SLC2A4 was also enriched for direct interactors found in the increased genes. This suggests that regulation of glucose transport might be central to the difference between these two GBM subtypes. Complete analysis of the increased genes can be found at: <http://amp.pharm.mssm.edu/Enrichr/enrich?dataset=1ahm>

### Aberrant copy number variation between multicentric and solitary radiophenotypes in GBM

CNV analysis was performed using Agilent SurePrint G3 Human CGH  $4 \times 180$  k arrays. Each tumor tissue was compared to normal tissue from the same individual. 11 and 17 chromosomal regions were found to be significantly increased and decreased in copy number in the multicentric radiophenotype compared to the solitary radiophenotype, respectively. Structural genetic variation, such as CNAs, can critically be correlated with gene expression and contributes to significant phenotypic variation [23, 24]. To identify the significant genes that exhibited concordant CNV and gene expression changes, we overlapped the two datasets as presented in the Venn diagram (Figure 4). Decreased copy number was more prevalent at 7q31.1, 12q14.3, and 13q34 in the multicentric radiophenotype. Gain was more prevalent at 7q23.1, 7q21.1, 10q23.1, and 12q14.1 in the multicentric phenotype. Eleven representative genes: CPM, LANCL2, LAMP1, GAS6, DCUN1D2, CDK4, AGAP2, TSPAN33, PDLIM1, CLDN12, and GTPBP10 demonstrated high correlations between copy number variation and gene expression in the tumor tissues.

### Differential gene expression profiles reveal activation of the extracellular matrix receptor interaction pathway in GBM with invasive radiophenotype

To obtain a more global mechanistic view of the altered biological pathways that could be responsible for invasiveness in GBM, we performed network analysis using the Expression2kinases (X2K) software [21]. In the first step of the X2K analysis, the lists of up- and down-regulated genes were used as input for enrichment analysis to generate a list of predicted upstream transcription factors. The transcription factor: SOX2, SUZ12, SMAD3, SMAD2, EGR1, PPARG, RARG, MTF2, AND NFE2L2 were predicted as top candidates that potentially regulate the expression of the up-regulated genes; and the transcription factors: E2F1, MYC, KLF4, POU5F1, SOX2, MITF, CLOCK, SALL4, EGR1 and TRIM28 were predicted as regulators of the down-regulation genes in the invasive phenotype (Figure 5). While there is some overlap among

these transcription factors, the predicted kinases upstream of these factors point clearly to two distinct processes. Nuclear kinases and casein kinases are enriched for the down regulated genes, consistent with the enrichment for cell cycle genes, whereas TGF beta receptors and other MAPK kinases are enriched for the upregulated genes. GSK3B, MAPK1 and HIPK2 are shared among both up and down predicted pathways. Overall these networks provide additional view of the potential regulatory mechanisms that differentiate the multicentric from the solitary GBM and potentially point to future drug targets (Figure 6).

### Validation of differentially expressed genes signatures in independent cohorts

To validate the differentially expressed genes signature in independent cohorts of patient samples, we used publicly available microarray data from the TCGA dataset. 166 of a total 508 GBM samples had corresponding imaging data from The Cancer Imaging Archive. From the 166 patients with primary GBM who had available clinical, genomic and radiological data, we binary classified 39 patients as having multicentric GBM, and 127 patients

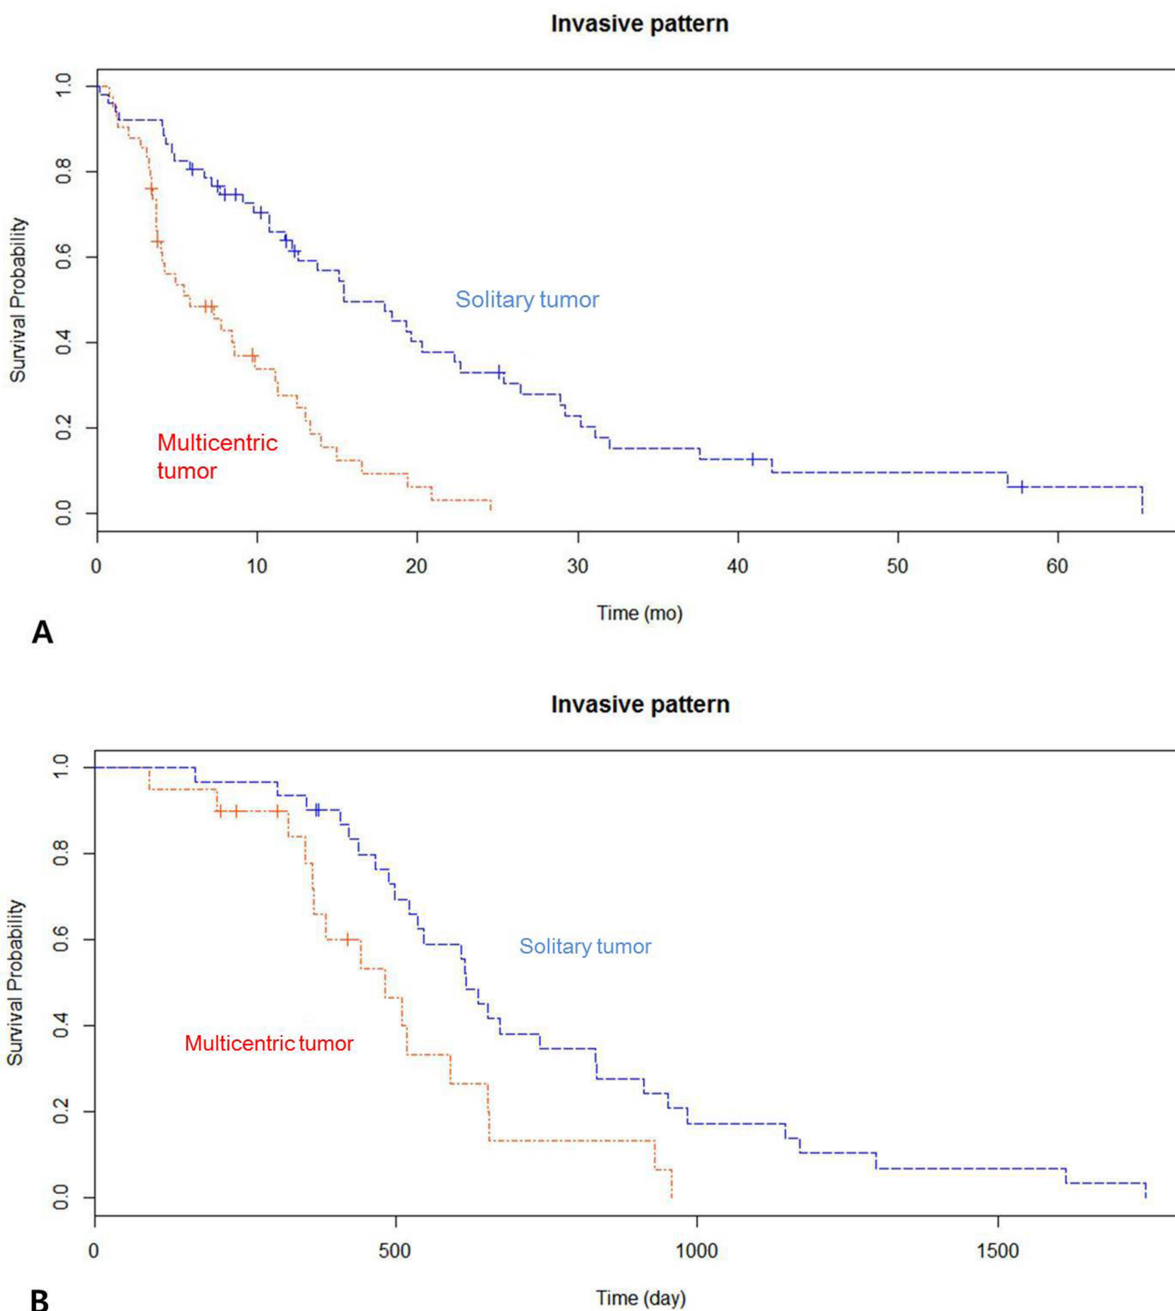

**Figure 1:** (A) Kaplan-Meier survival curves showing overall survival between the two groups in the 51 patients with newly diagnosed glioblastoma (GBM). (B) Kaplan-Meier survival curve demonstrating overall survival between the two groups in the TCGA dataset with newly diagnosed GBM.

having solitary GBM using preoperative MR imaging. Cox proportional hazard model and log rank test revealed that GBM patients with multicentric radiological phenotype had

worse prognosis than those with solitary phenotype (median 7.23 vs. 15.06 months,  $p < 0.0001$ ) (Figure 2B). Based upon a predefined set of molecular markers specific to the

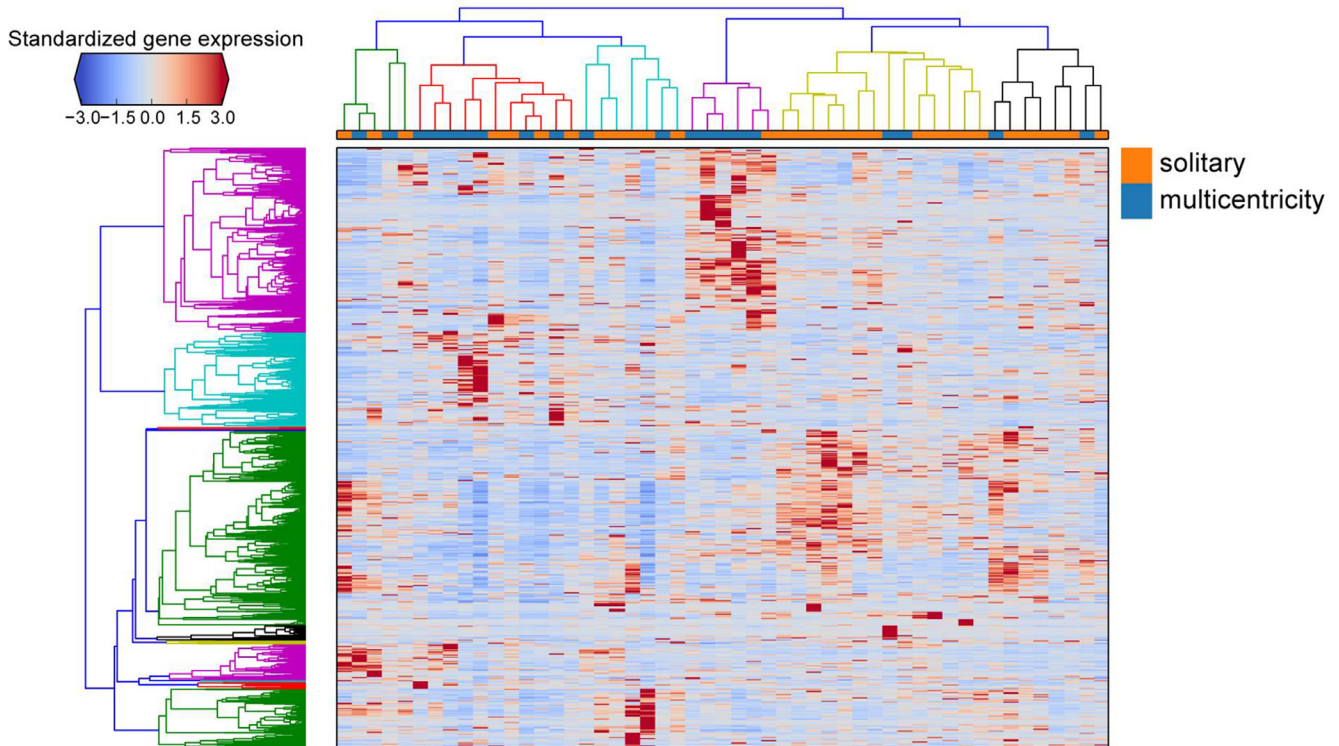

**Figure 2: Hierarchical clustering of the gene expression matrix.** The standardized expression values of differentially expressed genes are shown in the heat map. Genes are clustered as the rows and patient samples are clustered as the column, with solitary and multicentricity tumor samples indicated by orange and blue, respectively.

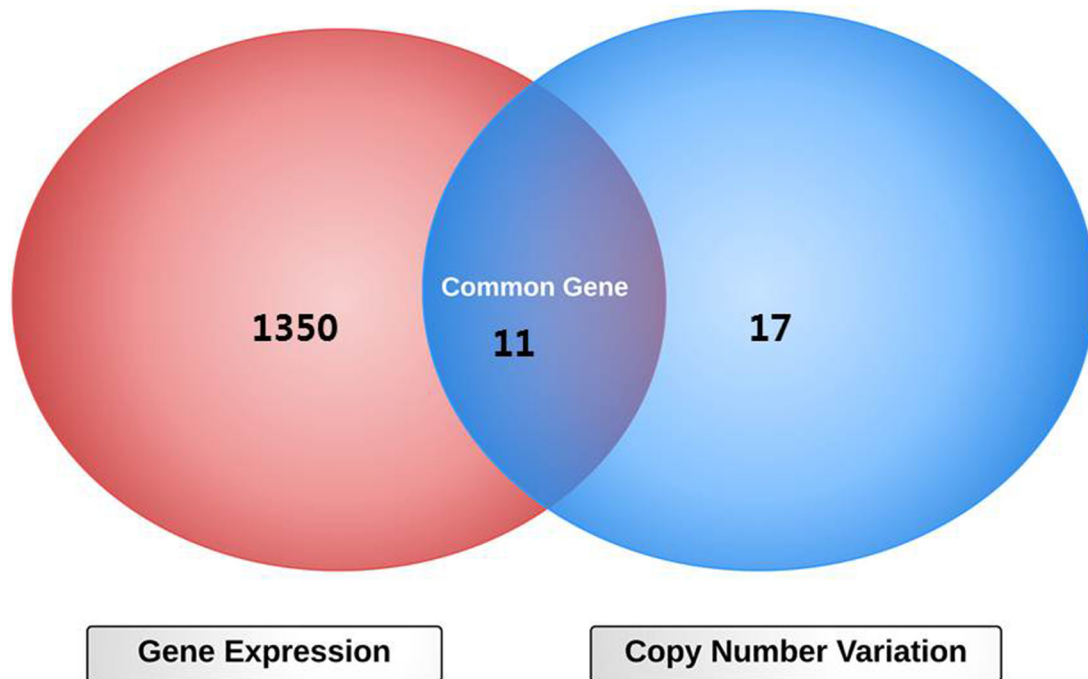

**Figure 3: Diagram overlapping differentially expressed genes and altered copy number variation between multicentric and solitary radiophenotypes in glioblastoma.**



multicentric group, we predicted the TCGA microarray dataset into two groups using the nearest template prediction (NTP) method with statistical significance (false discovery rate,  $FDR < 0.2$ ). As a result, we found 76.9%

(30 of 39) samples in the multicentric group represented predefined markers of multicentric group, while 60.6% (77 of 127 patients) in the solitary group showed them (Pearson Chi-square test,  $p = 0.063$ ).

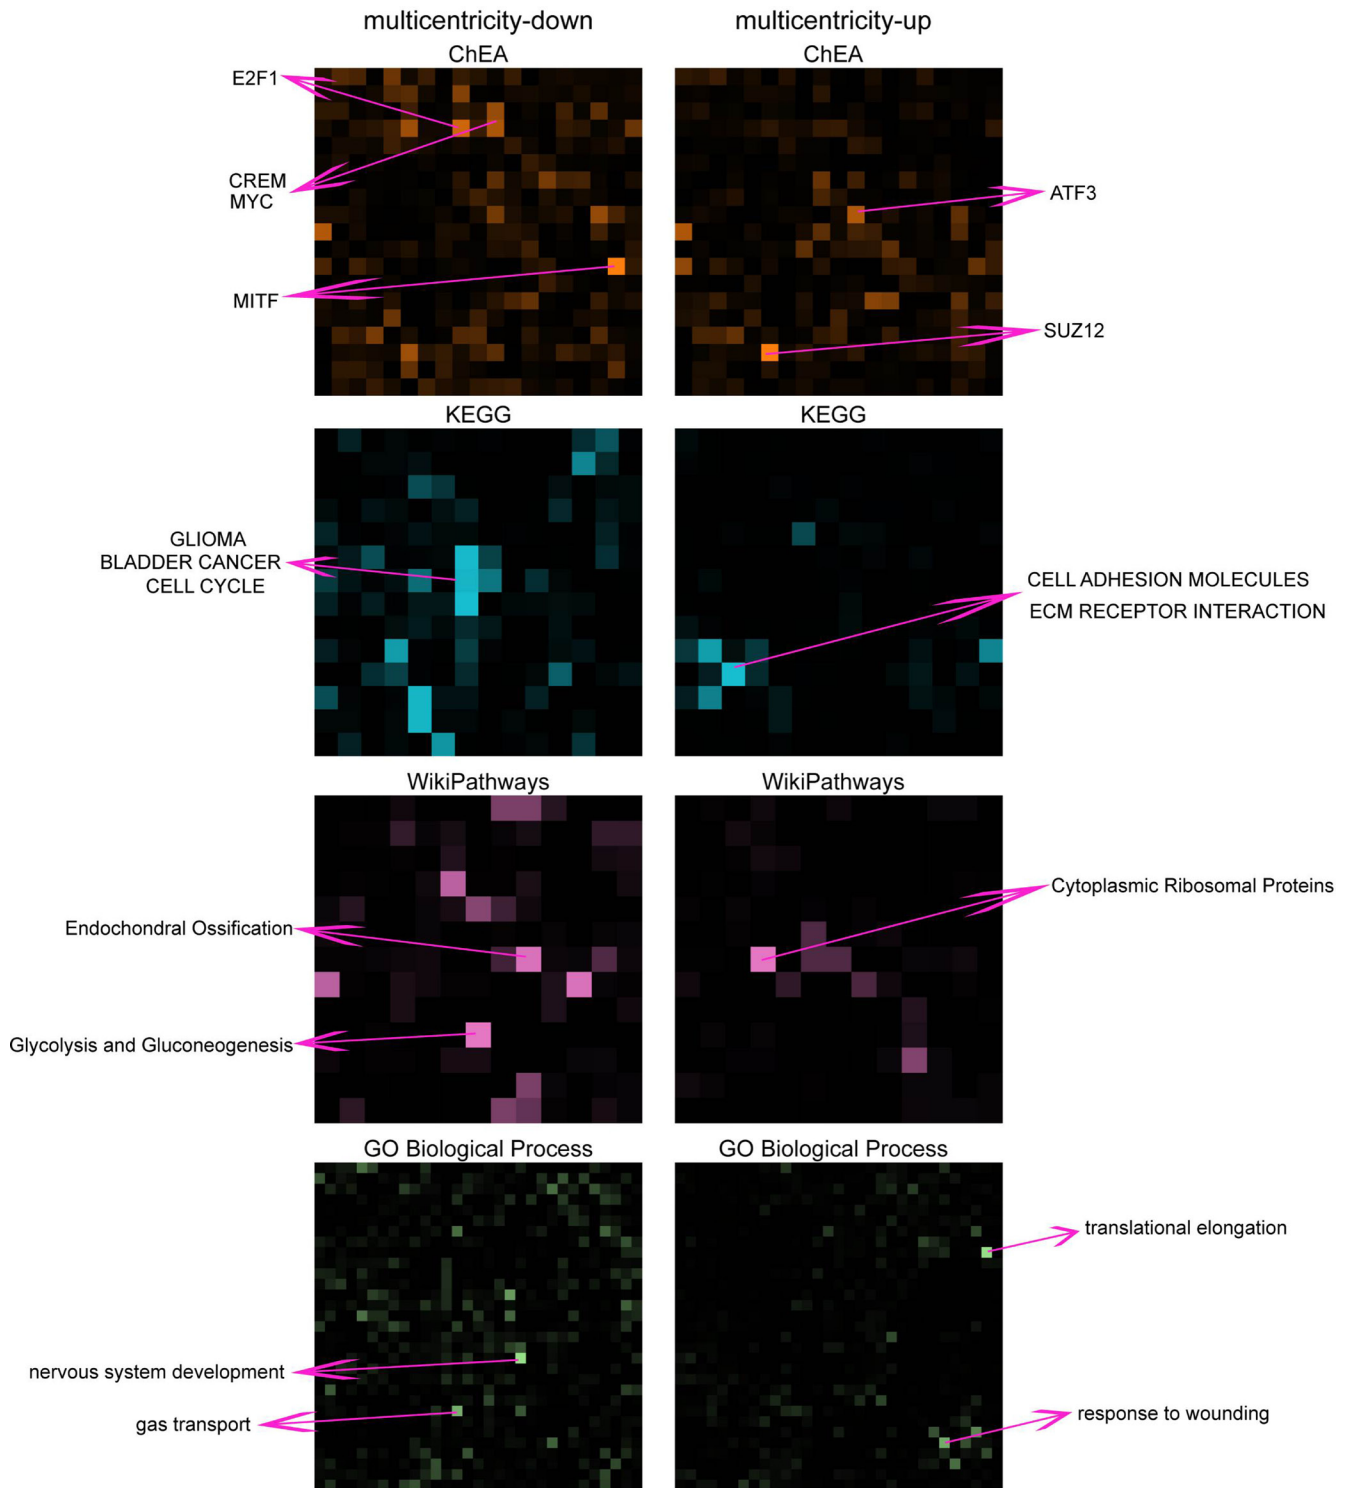

**Figure 4: Visualization of enriched gene-sets in down- and up-regulated genes in multicentricity tumors over solitary tumors.** The enrichment of gene-sets for multicentricity and solitary tumors are shown in grids of different colors representing different gene-set libraries: ChEA, KEGG, WikiPathways and Gene Ontology Biological Process. Each square in the grid represents a gene-set and the brightness of the square positively correlate with the significance of the enrichment. Top enriched gene-sets are annotated.

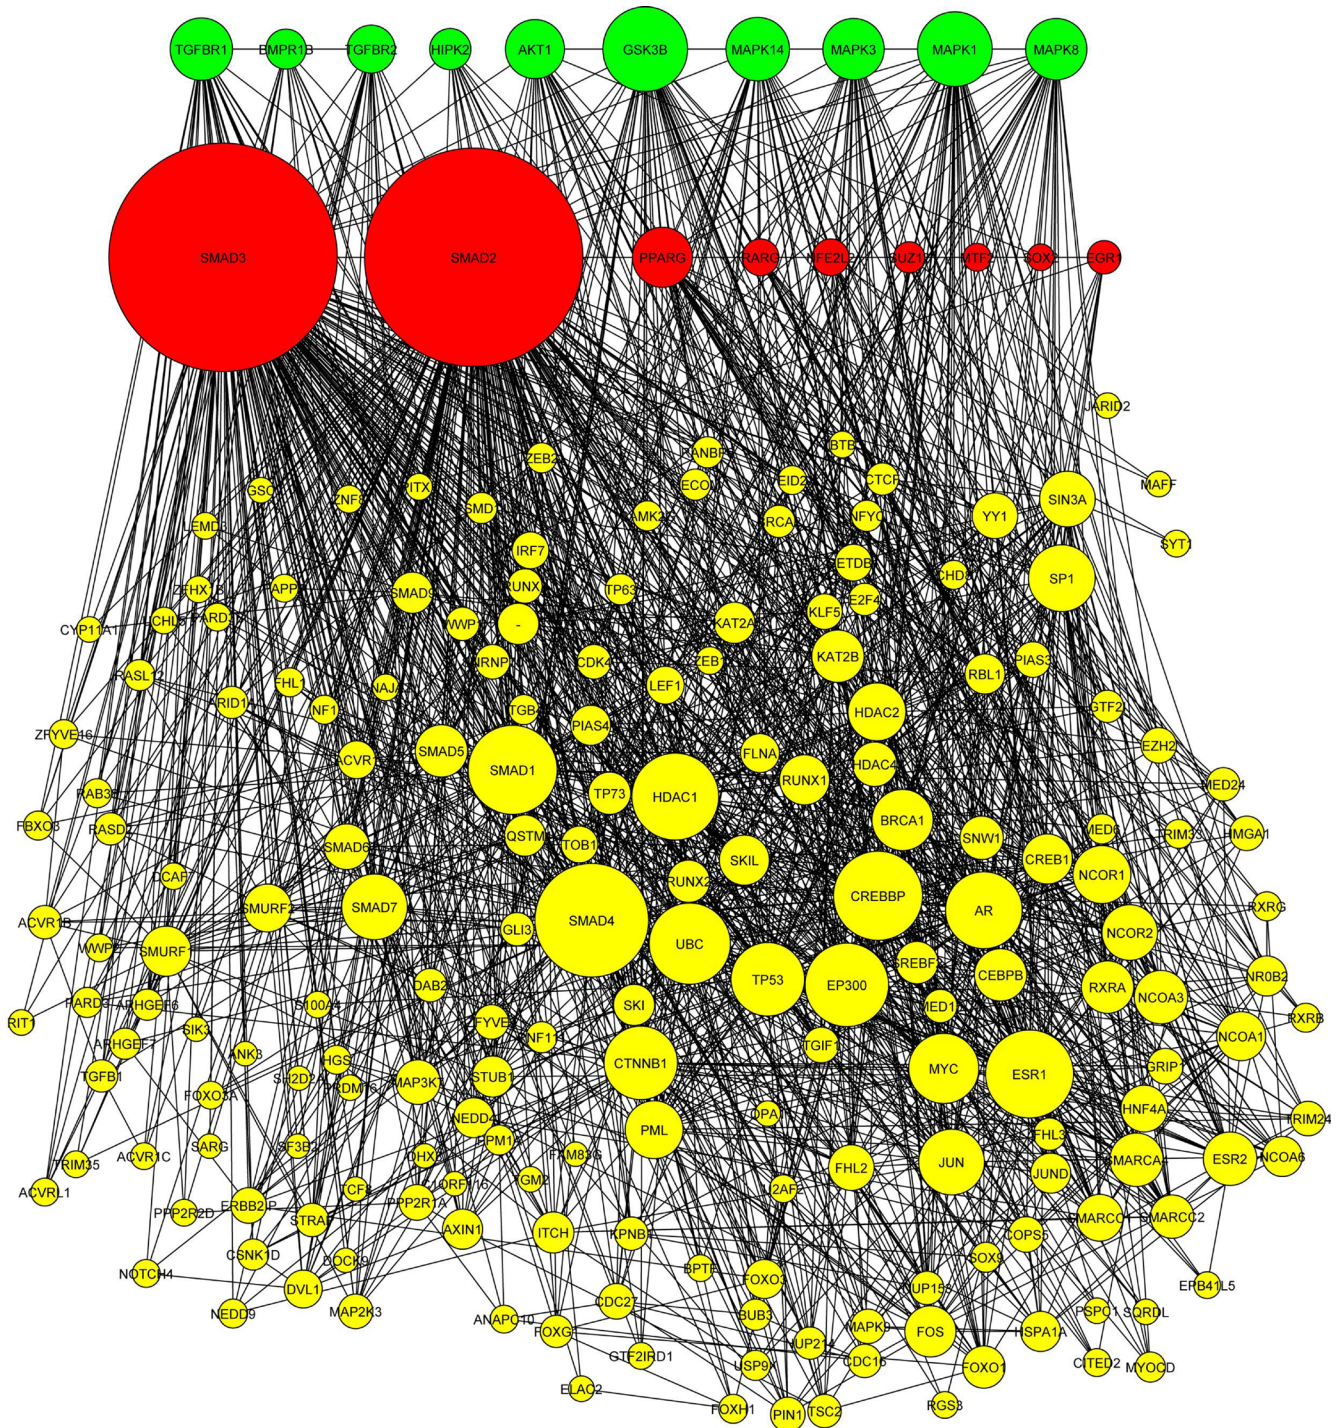



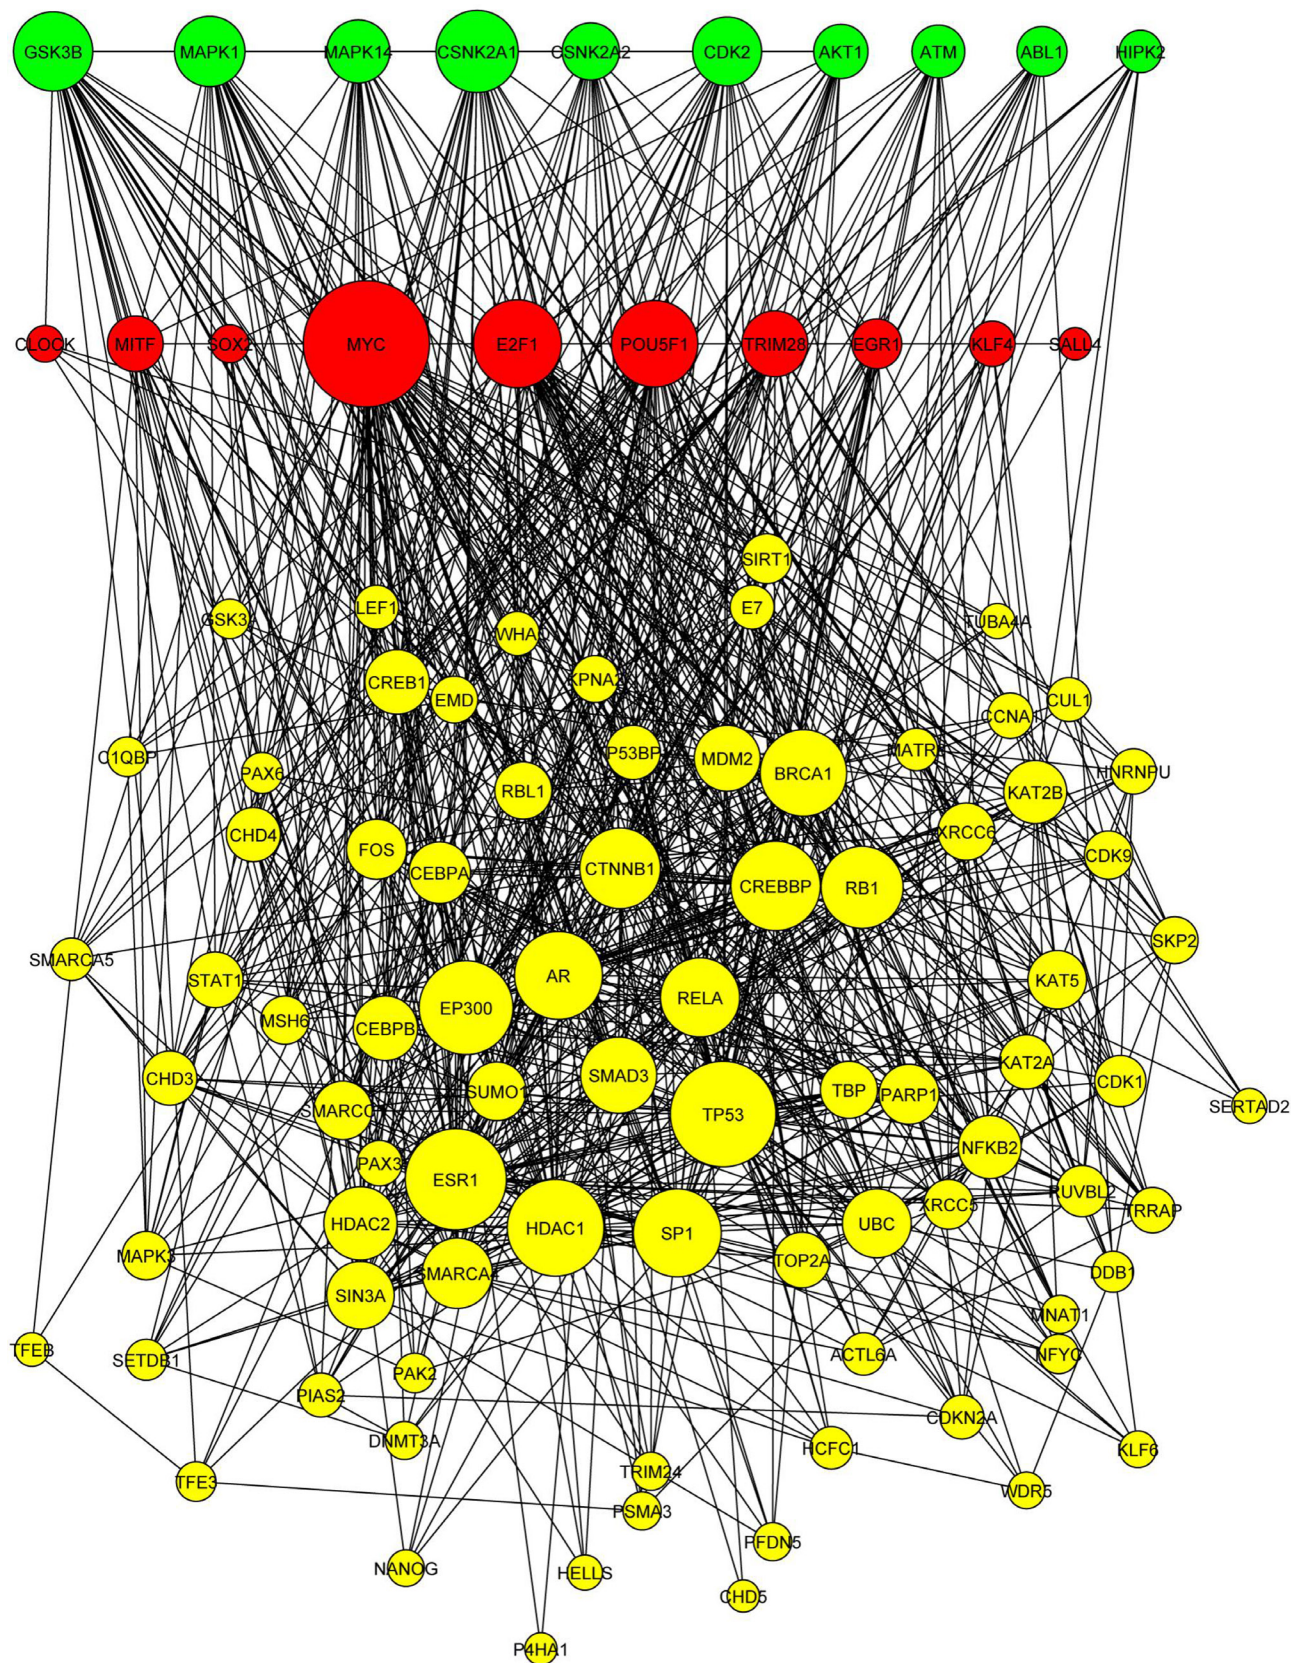

**Figure 5: Network analysis using Expression2Kinase.** (A) The transcription factors (red nodes), kinases (green nodes), and intermediate proteins (yellow nodes) predicted as top candidates to regulate the expression of the up-regulated genes in multicentric GBM compared with solitary. (B) The transcription factors, kinases, and intermediate proteins predicted for down-regulating genes with the more invasive phenotype.



## DISCUSSION

The dismal prognosis of GBM is attributed to the invasiveness of GBM cells to infiltrate surrounding brain parenchyma. Such invasiveness is the major cause of tumor recurrence or progression. The tumors with the most aggressive invasive phenotype are more likely to have multiple tumor foci (multicentricity) compared with the other forms of GBM.

Multicentric gliomas are well-separated lesions, localized in different lobes or hemispheres, without anatomical continuity between lesions [25–27]. Overall incidence of multifocal or multicentric glioblastoma ranges from 16.2 to 35% at the time of initial diagnosis, which is higher than was previously considered [25–28]. Continuous advances in MR imaging technologies have contributed to the increase diagnosis of multiplicity in gliomas. A growing number of studies supported that changes in T2-weighted images or FLAIR sequences can reflect modifications in the extracellular matrix by invading glioma cells [28–30]. A recent study by Patil, et al. [31] suggested that multicentricity GBM was biologically different from single lesion disease and spreads more quickly, leading to worse survival. Therefore, we hypothesized that multiple lesions in GBM can represent more invasive phenotype and have their own underlying molecular genomic characteristics.

To account for this complex relationship between multiple genomic profiles and invasive phenotype in GBM, we performed integrative analysis of multicentric radiophenotype imaging and genomic data including gene expression and CNV profiling. First, we found that multicentric radiophenotype in GBM was closely associated with overall survival as observed in two independent GBM cohorts (TCGA and Samsung Medical Center). This finding was consistent with the concept that multicentric GBM represents a more aggressive and invasive phenotype, leading to poor clinical outcome. We then determined the relationship between invasive imaging phenotype and the respective gene-expression profiles assessed by next generation RNA-seq analysis.

High-throughput sequencing technology is rapidly becoming the standard method for measuring RNA expression levels [32, 33]. Finding genes that are differentially expressed between the two radiophenotypes is an integral step toward understanding the molecular basis of this phenotypic variation. Combined with copy number alterations detected by CGH arrays we provided a comprehensive view to discover underlying candidate genes. As CNV harboring duplications and deletions potentially lead to changes in gene expression levels [34–36]. Concordance between RNA gene expression levels and CNV gene dosage has been found in several genes in multiple cancers [37–41]. Accordingly, integrated analysis of radio-genomic data can discover copy number alterations and their possible regulatory effects on gene expression in the specific imaging phenotype [42–44].

In this study, CGH arrays revealed that chromosomes at 7q, 12q and 13q had decreased copy number compared with non-invasive phenotype. Gene expression profiles demonstrated that up-regulated genes in the multicentric phenotype were associated with cell adhesion and cell-to-cell interactions functions. Among eleven representative genes showing high correlations between copy number and gene expression in this study, LAMP1 is a late endosomal/lysosomal marker [45, 46] associated with tumor cell motility and invasiveness. GAS6, major ligand of AXL receptor tyrosine kinase, is also notable because it has been demonstrated to be overexpressed and activated in many human cancers such as lung, breast, and pancreatic, and have been correlated with poor prognosis, promotion of increased invasiveness and metastasis, the EMT phenotype and drug resistance [47–51]. AGAP2 belongs to the centaurin gamma-like family. It mediates anti-apoptotic effects of nerve growth factor by activating nuclear phosphoinositide 3-kinase. AGAP2 is overexpressed in cancer cells, and promotes cancer cell invasion [41, 52, 53]. In the future, those characteristic molecular candidates can be further investigated to be closely involved with the tumor invasiveness and as such are great candidates for future *in-vitro* and *in-vivo* studies. In conclusion, integrative radiogenomics analysis provides more in-depth knowledge about the genomic landscape of glioblastoma.

## MATERIALS AND METHODS

### Patient population

Between May 2004 and June 2010, 51 GBM tumor samples with available clinical and pathology reports were obtained from the Samsung Medical Center data registry (SMC, Seoul, Korea). Recurrent tumors, secondary GBM, previous history of treatment and those without comprehensive clinical information were excluded from this study. All tissue samples were previously untreated surgical specimens from patients with grade IV gliomas, which were histologically confirmed grade IV GBM according to the World Health Organization (WHO) classification [13] and collected with written informed consent under a protocol approved by the Institutional Review Board of the Samsung Medical Center (2010-04-004, Seoul, Korea). Median age of the patients was 53 years (range, 29-74 years) and patients were composed of 31 males and 20 females. The metadata about the 51 GBMs samples are provided in Table S1.

To validate the prognostic value of our multicentric radiophenotype in the primary dataset, we used the original material and data provided by The Cancer Genome Atlas (TCGA) [14] and corresponding imaging data from The Cancer Imaging Archive (TCIA) [15, 16], which are publicly available resources containing multidimensional genomic and clinical information about GBM before 2014.



We first downloaded the DICOM files from TCIA GBM database and analyzed their MR data with the open-source OsiriX software (<http://www.osirix-viewer.com/>). All MR images were acquired by using the same imaging protocol as described above. Using clinical data from the TCGA dataset based upon this classification of multicentricity, we performed survival analysis on 230 patients with primary GBM (treatment naive GBM).

### MR imaging protocol

MR imaging in this study was conducted on a 1.5 T and 3.0 T scanner and included T1-weighted, T2-weighted, and fast-spin echo sequences. Post-contrast images were acquired 5 minutes after contrast agent injection. The standard MRI protocol included axial T1-weighted imaging, T2-weighted imaging, and fluid-attenuated inversion recovery (FLAIR), perfusion-weighted MR images.

### Definition of multicentric GBMs on MR finding

All MRI exams were performed on a 1.5 T Sigma Echospeed scanner (GE Medical Systems). All GBMs were binary classified as multicentric or solitary phenotype by their radiological MR characteristics. Multicentricity of the tumor on MR images was defined as the presence of multiple foci on the T1 contrast enhancement image (Figure 1A), or high signal multiple lesions without contiguity of each other on the FLAIR image (Figure 1B). All images were evaluated by consensus in a blinded fashion by two board-certified radiologists (ST Kim, 24 year-experience & JH Cha 4 year-experience). Both readers were blinded to the genomic signatures and other clinical details at the time of image interpretation.

### Survival analysis

Overall survival (OS) was defined as the time between the date of pathological diagnosis and the date of death or the date of last clinical follow-up. The univariable Cox proportional hazards model was used to determine hazard ratios (HRs) of each variable as a predictor of OS. Kaplan-Meier survival analysis was performed using R 3.0.1 (Vienna, Austria; <http://www.R-project.org/>) and  $p$ -value < 0.05 was deemed statistically significant.

### Comparative genome hybridization array (CGH)

For 32 of a total of 51 patients, CGH array data was collected. DNA was extracted using the DNeasy kit. CGH arrays were applied using Agilent SurePrint G3 Human CGH 4 × 180 k arrays, according to the manufacturer's instructions. CGH FE files were processed and normalized, using the Agilent Genomic WorkBench 7.0.4.0. The DNACopy R package was used to estimate DNA copy number for genomic segments. From the segmentation data,

the copy number of each gene was calculated, by averaging copy numbers of all exonic segments of each gene.

### Next-generation RNA-sequencing (RNA-Seq)

RNA-Seq was performed for all the 51 patients. RNA-Seq based transcriptome profiling was performed by the Samsung Institute for Intractable Cancer Research (Seoul, Korea), using the Illumina TrueSeq RNA Sample Prep kit. For the samples subjected to RNA-seq, we isolated 5 µg of total RNA from each sample. For quantitation of mRNA abundance, sequenced reads in FASTQ files were trimmed to include only 30 nucleotides from the 5' end of each read. The trimmed reads were aligned on the human reference genome (hg19) using GSNAP, not allowing any mismatches, indels, or splicing variants. The resulting alignment SAM files were sorted and summarized into BED files using SAMtools and bedTools (bamToBed). The DEGseq R package was used to calculate RPKM (Reads Per Kilobase per Million mapped reads) from the hg19 refFlat file downloaded from the UCSC genome browser and the BED files that were generated during the per nucleotide coverage analysis. Log transformation was applied to correct for the skewed distribution.

To identify the differentially expressed genes in the multicentric GBMs, DEGseq was used. The input to DEGseq was uniquely mapped reads from the RNA-seq data with a gene annotation of the corresponding gene expression values. The DEGseq R package MA-plot-based method was used to estimate the noise level by comparing technical replicates in the data by integrating the Fisher's exact test and likelihood ratio tests [17, 18].  $P$ -values calculated for each gene are adjusted to  $Q$ -values for multiple hypotheses testing with Benjamini and Hochberg (BH) [19] or Storey [20] correction methods.

### Integration of copy number variation and genome-wide expression analyses

Data from copy number variation (CNV) and genome-wide expression profiles were analyzed individually (Figure 1C). To identify the significant genes that exhibited CNV and gene expression changes, we overlapped the two datasets as presented in the Venn diagram. Thus, correlation between mRNA and CNV signatures was performed for all 32 patients having CNV and expression data. Subsequent analysis and correlation with the imaging features was performed for all patients as well.

### Pathway analysis

The dataset containing differentially expressed genes was uploaded into the Expression2Kinases (X2K) software [21]. The first step of the X2K computational pipeline is to perform gene-set enrichment analysis, using the ChIP-seq/chip Enrichment Analysis (ChEA) database on the differentially expressed genes to identify the likely

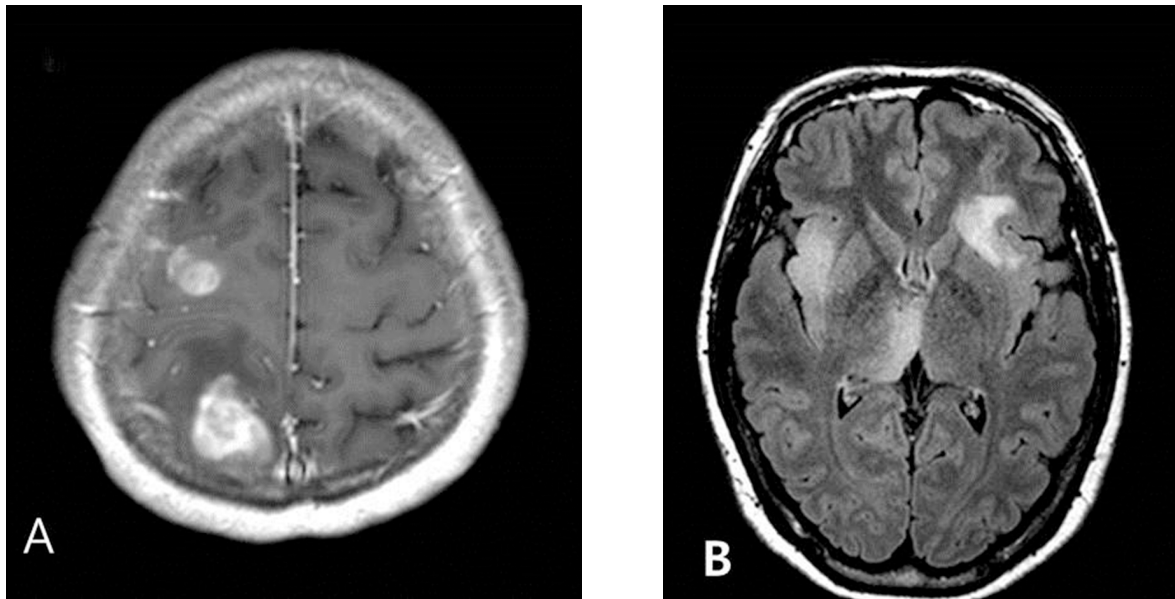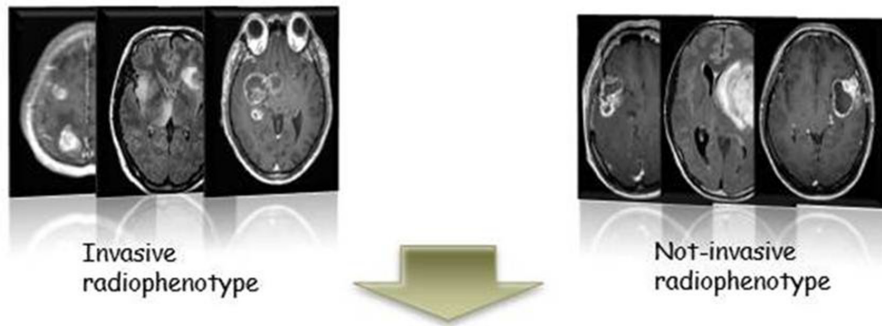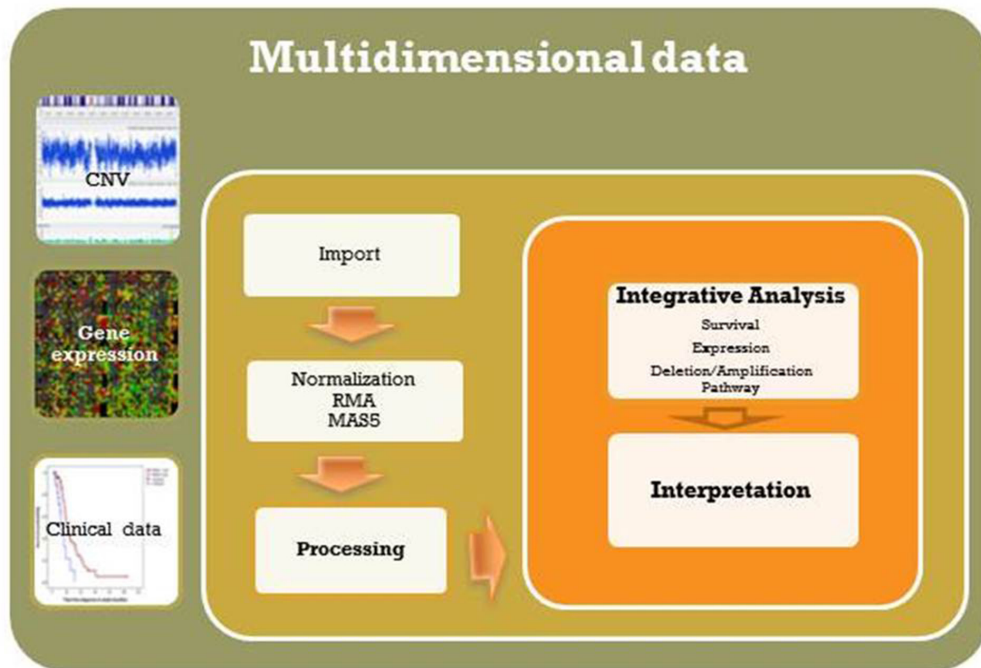

C

**Figure 6: Multicentric phenotypes defined in glioblastoma.** (A) Multiple enhancing tumors on T1 contrast enhancement MR image. (B) Multiple infiltrative lesions without continuity on the FLAIR image. (C) Schematic diagram of this study.

transcription factors that are responsible for the observed changes in expression. The Fisher exact test ( $p < 0.05$ , with BH correction) was used to assess the significance of the associations between the list of differentially expressed genes and targets of the transcription factors based on prior ChIP-Seq published studies. The next step in the X2K pipeline is to connect the enriched transcription factors using known protein-protein interactions. Using the shortest path algorithm and a collection of online protein-protein databases, a subnetwork is constructed to expand the set of transcription factors to its local protein interaction neighborhood. Finally, the X2K pipeline applies kinase enrichment analysis applied to all the proteins in the subnetworks, to predict the most likely upstream protein kinases that are involved in the observed changes in gene expression. The kinase enrichment analysis is performed using the kinase enrichment analysis (KEA) module within X2K with the same statistical test as the enrichment analysis for the transcription factors.

### Other statistical analyses

Hierarchical clustering of the gene expression matrix was performed by taking the RPKMs of the 1,361 differentially expressed genes identified by DEGseq [1] across all 51 patient tumor samples. Correlation distance was used to measure the dissimilarities between genes and samples. The average linkage function was used for agglomerative clustering. Enrichment analysis of the lists of differentially expressed genes was performed using Enrichr [2] to examine the overlap of genes across multiple gene-set libraries. The enriched gene-sets were visualized using Rubik (<http://amp.pharm.mssm.edu/rubik/>). Most other calculations were performed using the R language and the R statistical programming environment with Bioconductor packages. GC content was calculated using the DEGseq package [22].

### ACKNOWLEDGMENTS AND FUNDING

This research was supported by a grant of the Korea Health Technology R & D Project through the Korea Health Industry Development Institute (KHIDI), funded by the Ministry of Health & Welfare, Republic of Korea (HI14C3418) and by Samsung Medical Center grant. AM is supported by NIH grants U54HL127624, U54CA189201, and R01GM098316.

### CONFLICTS OF INTEREST

There no potential conflicts of interest to declare.

### REFERENCES

1. Jamshidi N, Diehn M, Bredel M and Kuo MD. Illuminating radiogenomic characteristics of glioblastoma multiforme through integration of MR imaging, messenger RNA expression, and DNA copy number variation. *Radiology*. 2014; 270: 1–2.
2. di Russo P, Perrini P, Pasqualetti F, Meola A and Vannozzi R. Management and outcome of high-grade multicentric gliomas: a contemporary single-institution series and review of the literature. *Acta Neurochir (Wien)*. 2013; 155: 2245–2251.
3. Djalilian HR, Shah MV and Hall WA. Radiographic incidence of multicentric malignant gliomas. *Surg Neurol*. 1999; 51: 554–557; discussion 557–558.
4. Salvati M, Ferrari M, Fiorenza F, Ramundo EO, Artico M, Cosentino F Jr, Cosentino F. Differential diagnosis of multiple gliomas, multicentric gliomas and the other main endocranial multifocal lesions. Presentation of a case [Article in Italian]. *G Ital Oncol*. 1989; 9:135–140.
5. Diehn M, Nardini C, Wang DS, McGovern S, Jayaraman M, Liang Y, Aldape K, Cha S and Kuo MD. Identification of noninvasive imaging surrogates for brain tumor gene-expression modules. *Proc Natl Acad Sci U S A*. 2008; 105: 5213–5218.
6. Gutman DA, Cooper LA, Hwang SN, Holder CA, Gao J, Aurora TD, Dunn WD, Jr., Scarpace L, Mikkelsen T, Jain R, Wintermark M, Jilwan M, Raghavan P, et al. MR imaging predictors of molecular profile and survival: multi-institutional study of the TCGA glioblastoma data set. *Radiology*. 2013; 267: 560–569.
7. Kong J, Cooper LA, Wang F, Gutman DA, Gao J, Chisolm C, Sharma A, Pan T, Van Meir EG, Kurc TM, Moreno CS, Saltz JH and Brat DJ. Integrative, multimodal analysis of glioblastoma using TCGA molecular data, pathology images, and clinical outcomes. *IEEE Trans Biomed Eng*. 2011; 58: 3469–3474.
8. Goyen M. Radiogenomic imaging-linking diagnostic imaging and molecular diagnostics. *World J Radiol*. 2014; 6: 519–522.
9. Mazurowski MA, Zhang J, Grimm LJ, Yoon SC and Silber JJ. Radiogenomic analysis of breast cancer: luminal B molecular subtype is associated with enhancement dynamics at MR imaging. *Radiology*. 2014; 273: 365–372.
10. Gevaert O, Mitchell LA, Achrol AS, Xu J, Echegaray S, Steinberg GK, Cheshier SH, Napel S, Zaharchuk G and Plevritis SK. Glioblastoma multiforme: exploratory radiogenomic analysis by using quantitative image features. *Radiology*. 2014; 273: 168–174.
11. Trotschel H. Radiogenomic analysis in breast cancer using mri - a new approach to the understanding of the underlying molecular biology [Article in German]. *Rofo*. 2013; 185:207.



12. Andreassen CN, Barnett GC, Langendijk JA, Alsner J, De Ruyscher D, Krause M, Bentzen SM, Haviland JS, Griffin C, Poortmans P and Yarnold JR. Conducting radiogenomic research—do not forget careful consideration of the clinical data. *Radiother Oncol.* 2012; 105: 337–340.
13. Yamamoto S, Maki DD, Korn RL and Kuo MD. Radiogenomic analysis of breast cancer using MRI: a preliminary study to define the landscape. *AJR Am J Roentgenol.* 2012; 199: 654–663.
14. Zinn PO, Mahajan B, Sathyan P, Singh SK, Majumder S, Jolesz FA and Colen RR. Radiogenomic mapping of edema/cellular invasion MRI-phenotypes in glioblastoma multiforme. *PLoS One.* 2011; 6: e25451.
15. Kuo MD, Gollub J, Sirlin CB, Ooi C and Chen X. Radiogenomic analysis to identify imaging phenotypes associated with drug response gene expression programs in hepatocellular carcinoma. *J Vasc Interv Radiol.* 2007; 18: 821–831.
16. Kato N, Itoh H, Serizawa A, Hatanaka Y, Umemura S and Osamura RY. Evaluation of HER2 gene amplification in invasive breast cancer using a dual-color chromogenic *in situ* hybridization (dual CISH). *Pathol Int.* 2010; 60: 510–515.
17. Francz M, Egervari K, Kardos L, Toth J, Nemes Z, Szanto J and Szollosi Z. Comparison of Pathvysion and Poseidon HER2 FISH assays in measuring HER2 amplification in breast cancer: a validation study. *J Clin Pathol.* 2010; 63: 341–346.
18. Chen EY, Xu H, Gordonov S, Lim MP, Perkins MH and Ma'ayan A. Expression2Kinases: mRNA profiling linked to multiple upstream regulatory layers. *Bioinformatics.* 2012; 28: 105–111.
19. Hefli M, von Campe G, Schneider C, Roelcke U and Landolt H. Multicentric tumor manifestations of high grade gliomas: independent proliferation or hallmark of extensive disease? *Cent Eur Neurosurg.* 2010; 71: 20–25.
20. Thomas RP, Xu LW, Lober RM, Li G and Nagpal S. The incidence and significance of multiple lesions in glioblastoma. *J Neurooncol.* 2013; 112: 91–97.
21. Stuckey SL and Wijedeera R. Multicentric/multifocal cerebral lesions: can fluid-attenuated inversion recovery aid the differentiation between glioma and metastases? *J Med Imaging Radiat Oncol.* 2008; 52: 134–139.
22. Patil CG, Yi A, Elramsisy A, Hu J, Mukherjee D, Irvin DK, Yu JS, Bannykh SI, Black KL and Nuno M. Prognosis of patients with multifocal glioblastoma: a case-control study. *J Neurosurg.* 2012; 117: 705–711.
23. Wang Z, Gerstein M and Snyder M. RNA-Seq: a revolutionary tool for transcriptomics. *Nat Rev Genet.* 2009; 10: 57–63.
24. Berger MF, Levin JZ, Vijayendran K, Sivachenko A, Adiconis X, Maguire J, Johnson LA, Robinson J, Verhaak RG, Sougnez C, Onofrio RC, Ziaugra L, Cibulskis K, et al. Integrative analysis of the melanoma transcriptome. *Genome Res.* 2010; 20: 413–427.
25. Stranger BE, Forrest MS, Dunning M, Ingle CE, Beazley C, Thorne N, Redon R, Bird CP, de Grassi A, Lee C, Tyler-Smith C, Carter N, Scherer SW, et al. Relative impact of nucleotide and copy number variation on gene expression phenotypes. *Science.* 2007; 315: 848–853.
26. Henrichsen CN, Chaigat E and Reymond A. Copy number variants, diseases and gene expression. *Hum Mol Genet.* 2009; 18: R1–8.
27. Schuster-Bockler B, Conrad D and Bateman A. Dosage sensitivity shapes the evolution of copy-number varied regions. *PLoS One.* 2010; 5: e9474.
28. Pollack JR, Sorlie T, Perou CM, Rees CA, Jeffrey SS, Lonning PE, Tibshirani R, Botstein D, Borresen-Dale AL and Brown PO. Microarray analysis reveals a major direct role of DNA copy number alteration in the transcriptional program of human breast tumors. *Proc Natl Acad Sci U S A.* 2002; 99: 12963–12968.
29. Chitale D, Gong Y, Taylor BS, Broderick S, Brennan C, Somwar R, Golas B, Wang L, Motoi N, Szoke J, Reinersman JM, Major J, Sander C, et al. An integrated genomic analysis of lung cancer reveals loss of DUSP4 in EGFR-mutant tumors. *Oncogene.* 2009; 28: 2773–2783.
30. Hirsch FR, Varella-Garcia M and Cappuzzo F. Predictive value of EGFR and HER2 overexpression in advanced non-small-cell lung cancer. *Oncogene.* 2009; 28 Suppl 1: S32–37.
31. Kawano O, Sasaki H, Okuda K, Yukiue H, Yokoyama T, Yano M and Fujii Y. PIK3CA gene amplification in Japanese non-small cell lung cancer. *Lung Cancer.* 2007; 58: 159–160.
32. Liu R, Tian B, Gearing M, Hunter S, Ye K and Mao Z. Cdk5-mediated regulation of the PIKE-A-Akt pathway and glioblastoma cell invasion. *Proc Natl Acad Sci U S A.* 2008; 105: 7570–7575.
33. Hobbs SK, Shi G, Homer R, Harsh G, Atlas SW and Bednarski MD. Magnetic resonance image-guided proteomics of human glioblastoma multiforme. *J Magn Reson Imaging.* 2003; 18: 530–536.
34. Van Meter T, Dumur C, Hafez N, Garrett C, Fillmore H and Broaddus WC. Microarray analysis of MRI-defined tissue samples in glioblastoma reveals differences in regional expression of therapeutic targets. *Diagn Mol Pathol.* 2006; 15: 195–205.
35. Aghi M, Gaviani P, Henson JW, Batchelor TT, Louis DN and Barker FG, 2nd. Magnetic resonance imaging characteristics predict epidermal growth factor receptor amplification status in glioblastoma. *Clin Cancer Res.* 2005; 11: 8600–8605.
36. Lekishvili T, Fromm E, Mujoomdar M and Berditchevski F. The tumour-associated antigen L6 (L6-Ag) is recruited to the tetraspanin-enriched microdomains: implication for tumour cell motility. *J Cell Sci.* 2008; 121: 685–694.
37. Raghu H, Sodadasu PK, Malla RR, Gondi CS, Estes N and Rao JS. Localization of uPAR and MMP-9 in lipid rafts is



- critical for migration, invasion and angiogenesis in human breast cancer cells. *BMC Cancer*. 2010; 10: 647.
38. Wu X, Liu X, Koul S, Lee CY, Zhang Z and Halmos B. AXL kinase as a novel target for cancer therapy. *Oncotarget*. 2014; 5: 9546–9563. doi: 10.18632/oncotarget.2542
  39. Abu-Thuraia A, Gauthier R, Chidiac R, Fukui Y, Screamton RA, Gratton JP and Cote JF. Axl phosphorylates Elmo scaffold proteins to promote Rac activation and cell invasion. *Mol Cell Biol*. 2015; 35: 76–87.
  40. Li N, Liu Z, Zhang Y, Chen Q, Liu P, Cheng CY, Lee WM, Chen Y and Han D. Mice lacking Axl and Mer tyrosine kinase receptors are susceptible to experimental autoimmune orchitis induction. *Immunol Cell Biol*. 2015; 93: 311–320.
  41. Suh YA, Jo SY, Lee HY and Lee C. Inhibition of IL-6/STAT3 axis and targeting Axl and Tyro3 receptor tyrosine kinases by apigenin circumvent taxol resistance in ovarian cancer cells. *Int J Oncol*. 2015; 46: 1405–1411.
  42. Tian R, Xie X, Han J, Luo C, Yong B, Peng H, Shen J and Peng T. miR-199a-3p negatively regulates the progression of osteosarcoma through targeting AXL. *Am J Cancer Res*. 2014; 4: 738–750.
  43. Qi Q and Ye K. The roles of PIKE in tumorigenesis. *Acta Pharmacol Sin*. 2013; 34: 991–997.
  44. Qi Q, He K, Liu X, Pham C, Meyerkord C, Fu H and Ye K. Disrupting the PIKE-A/Akt interaction inhibits glioblastoma cell survival, migration, invasion and colony formation. *Oncogene*. 2013; 32: 1030–1040.
  45. Kleihues P, Louis DN, Scheithauer BW, Rorke LB, Reifenberger G, Burger PC and Cavenee WK. The WHO classification of tumors of the nervous system. *J Neuropathol Exp Neurol*. 2002; 61: 215–225; discussion 226–219.
  46. Cancer Genome Atlas Research N. Comprehensive genomic characterization defines human glioblastoma genes and core pathways. *Nature*. 2008; 455: 1061–1068.
  47. Gutman DA, Cobb J, Somanna D, Park Y, Wang F, Kurc T, Saltz JH, Brat DJ and Cooper LA. Cancer Digital Slide Archive: an informatics resource to support integrated in silico analysis of TCGA pathology data. *J Am Med Inform Assoc*. 2013; 20: 1091–1098.
  48. Clark K, Vendt B, Smith K, Freymann J, Kirby J, Koppel P, Moore S, Phillips S, Maffitt D, Pringle M, Tarbox L and Prior F. The Cancer Imaging Archive (TCIA): maintaining and operating a public information repository. *J Digit Imaging*. 2013; 26: 1045–1057.
  49. Bloom JS, Khan Z, Kruglyak L, Singh M and Caudy AA. Measuring differential gene expression by short read sequencing: quantitative comparison to 2-channel gene expression microarrays. *BMC Genomics*. 2009; 10: 221.
  50. Marioni JC, Mason CE, Mane SM, Stephens M and Gilad Y. RNA-seq: an assessment of technical reproducibility and comparison with gene expression arrays. *Genome Res*. 2008; 18: 1509–1517.
  51. Hochberg Y and Benjamini Y. More powerful procedures for multiple significance testing. *Stat Med*. 1990; 9: 811–818.
  52. Storey JD and Tibshirani R. Statistical significance for genomewide studies. *Proc Natl Acad Sci U S A*. 2003; 100: 9440–9445.
  53. Wang L, Feng Z, Wang X, Wang X and Zhang X. DEGseq: an R package for identifying differentially expressed genes from RNA-seq data. *Bioinformatics*. 2010; 26: 136–138.
