# Supplementary material for: Integrative radiogenomic analysis for multicentric radiophenotype in glioblastoma
Source: PubMed Central journal article supplement (PMC4905491; doi:10.18632/oncotarget.7115), 2016-02-01
Supplement: oncotarget-07-11526-s001.pdf [file oncotarget-07-11526-s001.pdf]

## **Integrative radiogenomic analysis for multicentric radiophenotype in glioblastoma**

### **Supplementary Materials**

#### **Supplementary Table 1: Clinico-pathological characteristics in patients with glioblastoma**
